# Supplementary material for: Comparing recurrent convolutional neural networks for large scale bird species classification
Source: PubMed Central journal article supplement (PMC8385065; doi:10.1038/s41598-021-96446-w), 2021-08-24
Supplement: 41598_2021_96446_MOESM1_ESM.pdf [file 41598_2021_96446_MOESM1_ESM.pdf]

# Supplementary Materials: Comparing Recurrent Convolutional Neural Networks for large scale Bird species classification

Gaurav Gupta<sup>1,\*</sup>, Meghana Kshirsagar<sup>2</sup>, Ming Zhong<sup>2</sup>, Shahrzad Gholami<sup>2</sup>, and Juan Lavista Ferres<sup>2</sup>

<sup>1</sup>Ming Hsieh Department of Electrical and Computer Engineering, University of Southern California, Los Angeles, CA 90089, USA.

<sup>2</sup>AI for Good Research Lab, Microsoft, Redmond, WA 98052, USA.

\*ggaurav@usc.edu

## Supplementary Materials

| stand-alone models |       |       |                   |       |              |                |       |       |                               |         |              |       |
|--------------------|-------|-------|-------------------|-------|--------------|----------------|-------|-------|-------------------------------|---------|--------------|-------|
| ResNet18<br>0.516  |       |       | ResNet50<br>0.537 |       |              | VGG16<br>0.619 |       |       | Temporal correlation with RNN |         |              |       |
| Size               | LSTM  |       |                   | GRU   |              |                | LMU   |       |                               | GRU+LMU |              |       |
|                    | 1     | 2     | 3                 | 1     | 2            | 3              | 1     | 2     | 3                             | 1       | 2            | 3     |
| CNN1               |       |       |                   |       |              |                |       |       |                               |         |              |       |
| 128                | 0.573 | 0.563 | 0.555             | 0.600 | 0.580        | 0.580          | 0.566 | 0.548 | 0.541                         | –       | 0.573        | 0.561 |
| 256                | 0.603 | 0.602 | 0.589             | 0.618 | 0.612        | 0.603          | 0.591 | 0.581 | 0.576                         | –       | 0.615        | 0.606 |
| 512                | 0.621 | 0.615 | 0.608             | 0.634 | 0.644        | 0.630          | 0.607 | 0.610 | 0.594                         | –       | 0.635        | 0.630 |
| CNN2               |       |       |                   |       |              |                |       |       |                               |         |              |       |
| 128                | 0.603 | 0.579 | 0.551             | 0.624 | 0.601        | 0.598          | 0.583 | 0.576 | 0.557                         | –       | 0.586        | 0.586 |
| 256                | 0.621 | 0.601 | 0.573             | 0.635 | 0.611        | 0.626          | 0.597 | 0.602 | 0.590                         | –       | 0.622        | 0.613 |
| 512                | 0.625 | 0.613 | 0.602             | 0.635 | 0.634        | 0.638          | 0.629 | 0.622 | 0.602                         | –       | 0.633        | 0.629 |
| CNN3               |       |       |                   |       |              |                |       |       |                               |         |              |       |
| 128                | 0.657 | 0.619 | 0.584             | 0.644 | 0.639        | 0.620          | 0.651 | 0.638 | 0.635                         | –       | 0.628        | 0.622 |
| 256                | 0.658 | 0.630 | 0.591             | 0.654 | 0.654        | 0.644          | 0.641 | 0.639 | 0.630                         | –       | 0.653        | 0.633 |
| 512                | 0.663 | 0.635 | 0.642             | 0.657 | <b>0.667</b> | 0.654          | 0.652 | 0.647 | 0.643                         | –       | <b>0.665</b> | 0.650 |

**Table 1. Test accuracy comparison on the CBC dataset: Top:** Models without any explicit temporal layer. The input is a single spectrogram for sound sample. **Bottom:** A comprehensive comparison of models test accuracy using RNN for temporal correlation. The complexity of CNN used for representation increase from top to bottom. The best accuracy achieved is shown in bold.

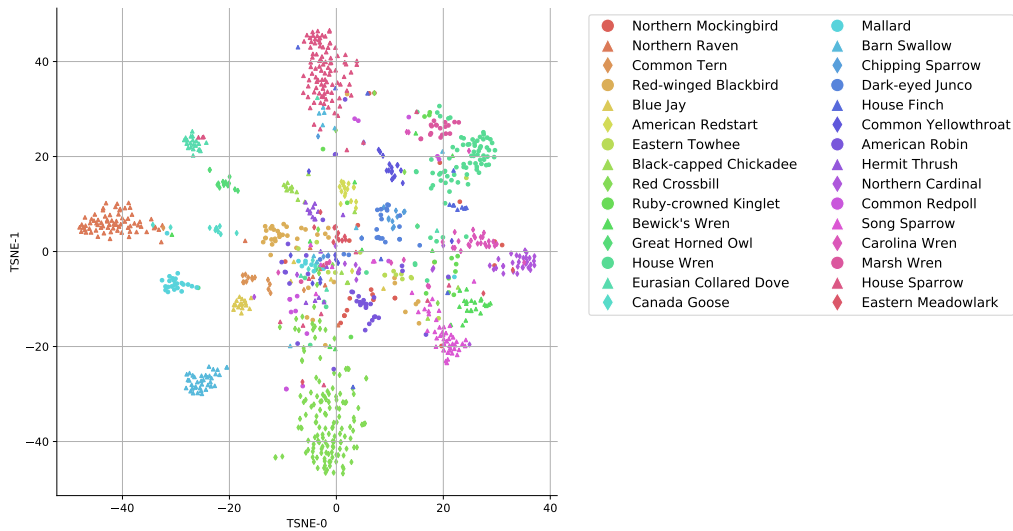

**Figure 2. Samples model representation:** t-SNE plot along two dimensions for 30 bird species with most number of samples. The test samples embedding is shown for CNN3+LSTM with hidden size of 512.

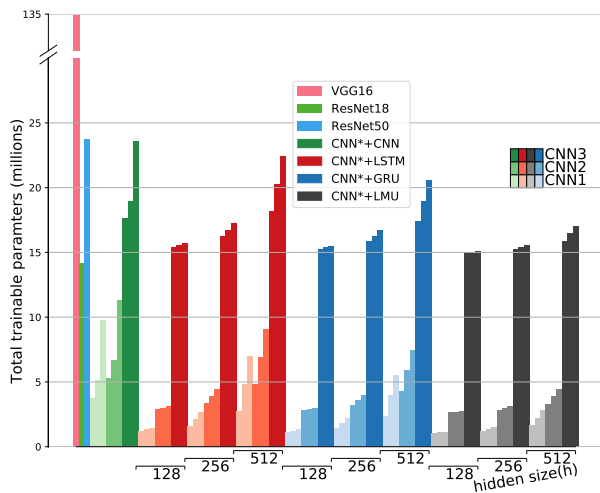

**Figure 1. Comparison of models. (b)** The model complexity in terms of total trainable parameters.

| Temporal correlation with CNN |          |       |       |
|-------------------------------|----------|-------|-------|
| Representation                | Temporal |       |       |
|                               | TCNN1    | TCNN2 | TCNN3 |
| CNN1                          | 0.489    | 0.493 | 0.503 |
| CNN2                          | 0.557    | 0.544 | 0.550 |
| CNN3                          | 0.579    | 0.577 | 0.614 |

**Table 2. Test accuracy comparison:** A comparison of the test accuracy for the CBC dataset using (CNN+CNN) hybrid models of different sizes. From top to bottom the complexity of the CNN layers extracting the representation increases, while from left to right the complexity of the TCNN layer that incorporates temporal correlation increases.

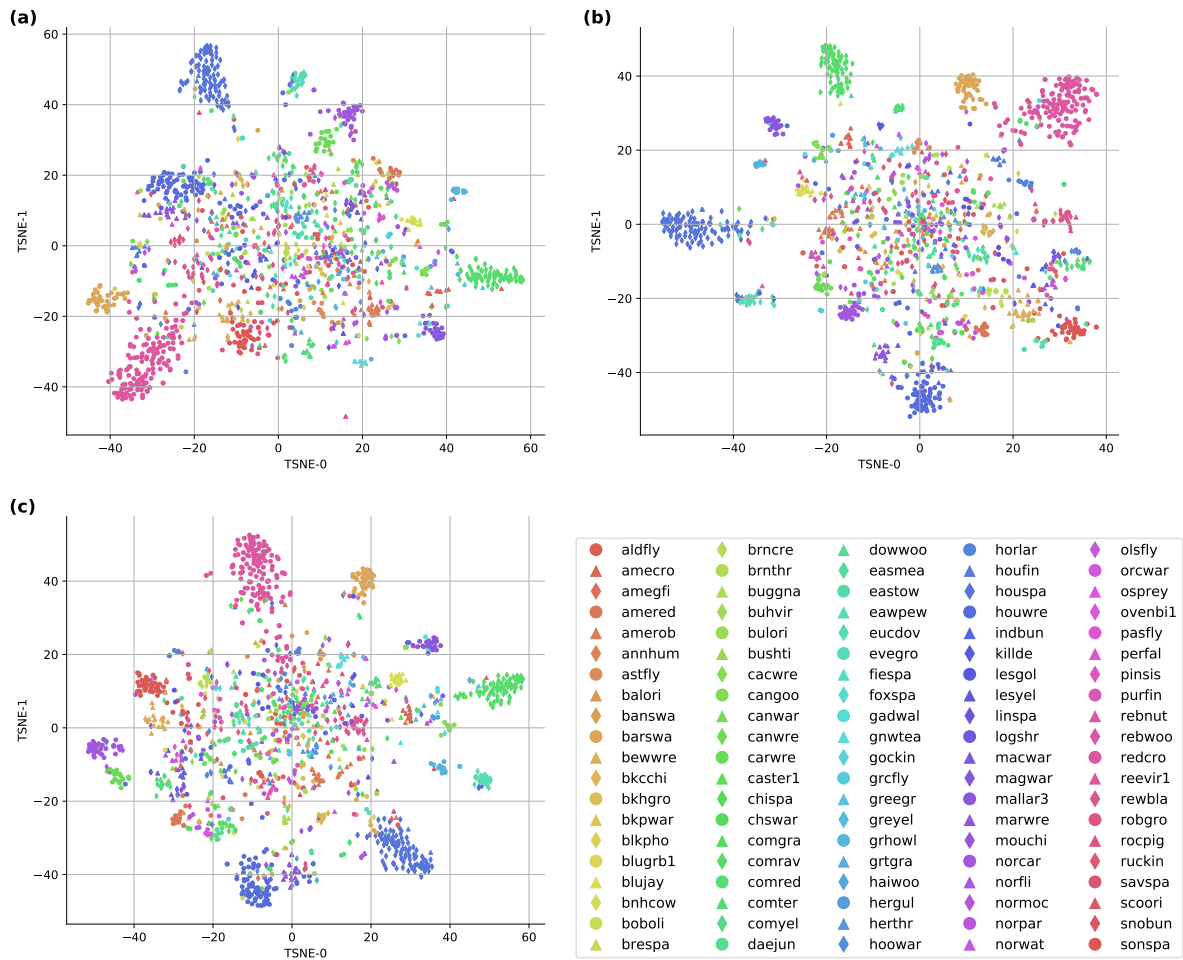

**Figure 3. Samples model representation:** t-SNE plot along two dimensions for 100 bird species. The test samples embedding is shown for CNN3+LMU, GRU, LSTM in (a), (b), (c), respectively, with hidden size of 512. For birds code see Supplementary Table 3, and for further related information we refer<sup>1</sup>.

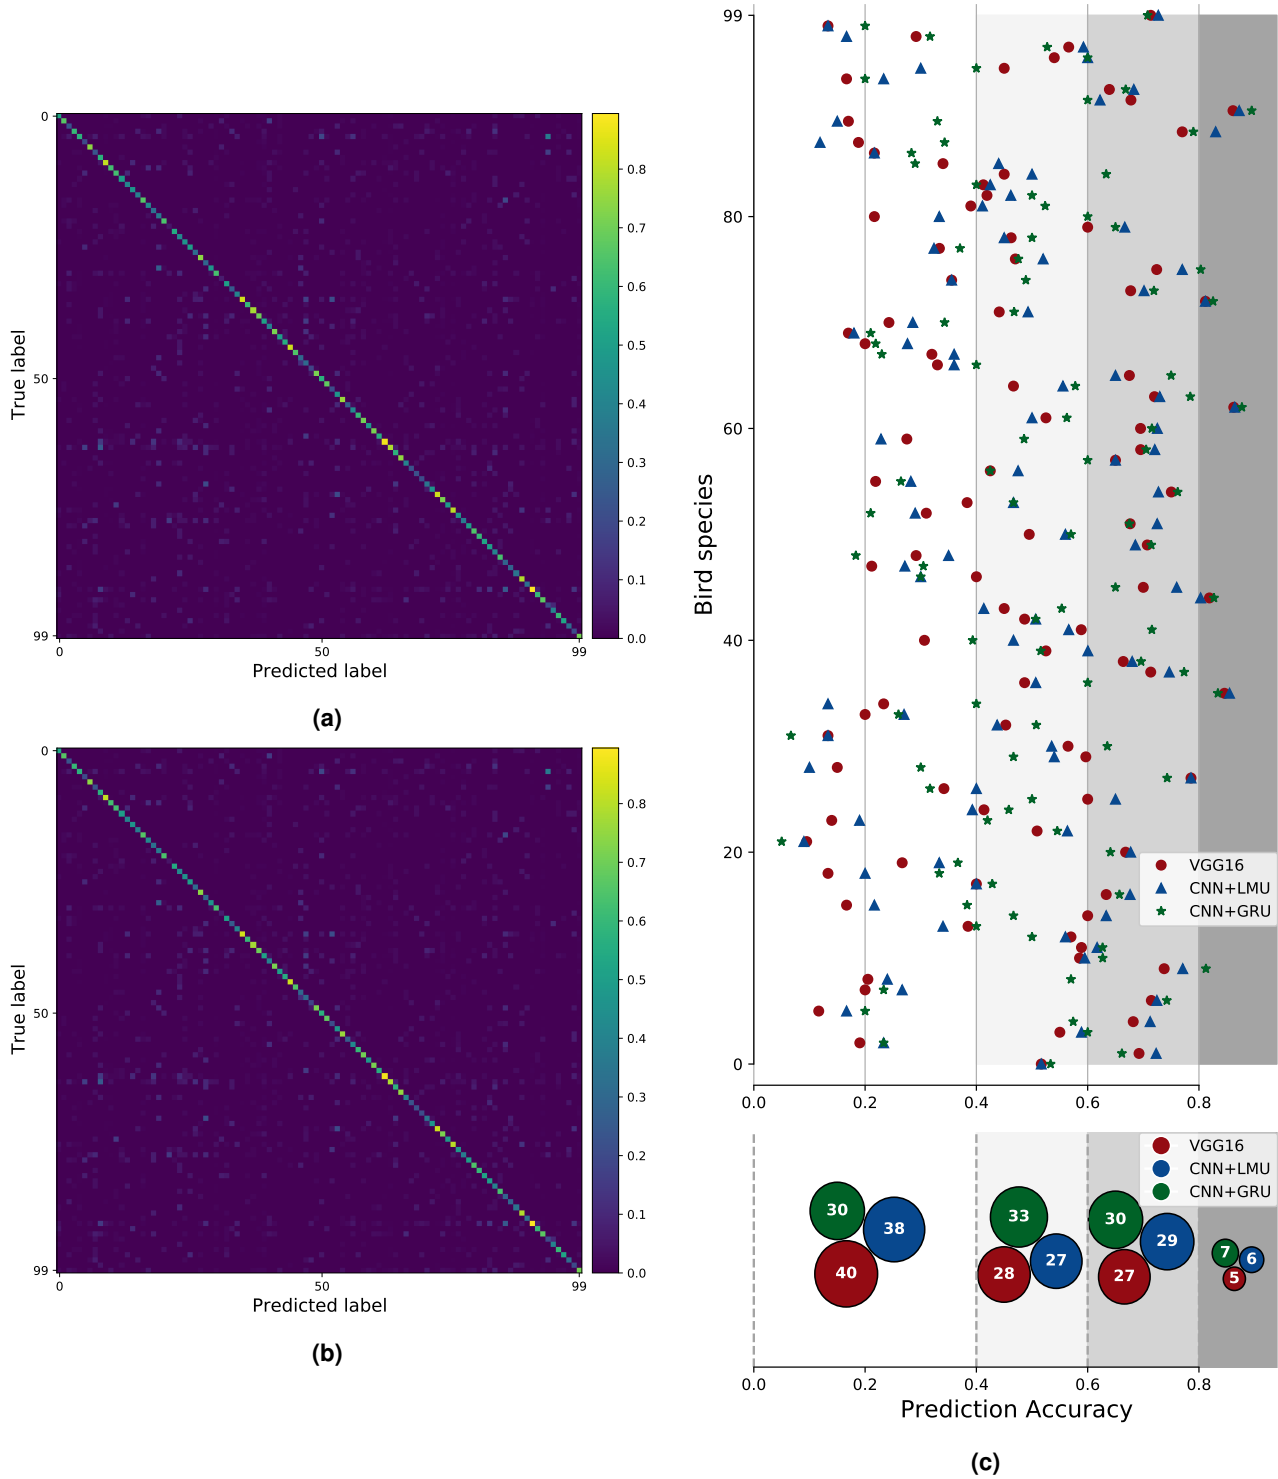

**Figure 4. Class-wise prediction accuracy:** Confusion matrix for the model predictions over 100 bird species. The values are shown for the best model, according to Table 1, of GRU, LMU in (a), (b), respectively. Class-wise prediction accuracy for the best GRU, LMU, and VGG16 model in (c). Top, bird species code on y-axis vs prediction accuracy on x-axis. In bottom, we show for each model, the percentage of classes that have prediction accuracy in the given shaded brackets. For birds code see Supplementary Table 3, and for further related information we refer<sup>1</sup>. For numerical values of the prediction accuracy, we refer to Supplementary Table 4.

| Index | bird code | bird species name       | Index | bird code | bird species name        |
|-------|-----------|-------------------------|-------|-----------|--------------------------|
| 0     | aldfly    | Alder Flycatcher        | 50    | gockin    | Golden-crowned Kinglet   |
| 1     | amecro    | American Crow           | 51    | grcfly    | Great Crested Flycatcher |
| 2     | amegfi    | American Goldfinch      | 52    | greegr    | Great Egret              |
| 3     | amered    | American Redstart       | 53    | greyel    | Greater Yellowlegs       |
| 4     | amerob    | American Robin          | 54    | grhowl    | Great Horned Owl         |
| 5     | annhum    | Anna's Hummingbird      | 55    | grtgra    | Great-tailed Grackle     |
| 6     | astfly    | Ash-throated Flycatcher | 56    | haiwoo    | Hairy Woodpecker         |
| 7     | balori    | Baltimore Oriole        | 57    | hergul    | European Herring Gull    |
| 8     | banswa    | Sand Martin             | 58    | herthr    | Hermit Thrush            |
| 9     | barswa    | Barn Swallow            | 59    | hoowar    | Hooded Warbler           |
| 10    | bewwre    | Bewick's Wren           | 60    | horlar    | Horned Lark              |
| 11    | bkcchi    | Black-capped Chickadee  | 61    | houfin    | House Finch              |
| 12    | bkhgro    | Black-headed Grosbeak   | 62    | houspa    | House Sparrow            |
| 13    | bkpwar    | Blackpoll Warbler       | 63    | houwre    | House Wren               |
| 14    | blkpho    | Black Phoebe            | 64    | indbun    | Indigo Bunting           |
| 15    | blugrb1   | Blue Grosbeak           | 65    | killde    | Killdeer                 |
| 16    | blujay    | Blue Jay                | 66    | lesgol    | Lesser Goldfinch         |
| 17    | bnhcow    | Brown-headed Cowbird    | 67    | lesyel    | Lesser Yellowlegs        |
| 18    | boboli    | Bobolink                | 68    | linspa    | Lincoln's Sparrow        |
| 19    | brespa    | Brewer's Sparrow        | 69    | logshr    | Loggerhead Shrike        |
| 20    | brncre    | Brown Creeper           | 70    | macwar    | MacGillivray's Warbler   |
| 21    | brnthr    | Brown Thrasher          | 71    | magwar    | Magnolia Warbler         |
| 22    | buggna    | Blue-grey Gnatcatcher   | 72    | mallar3   | Mallard                  |
| 23    | buhvir    | Blue-headed Vireo       | 73    | marwre    | Marsh Wren               |
| 24    | bulori    | Bullock's Oriole        | 74    | mouchi    | Mountain Chickadee       |
| 25    | bushti    | American Bushtit        | 75    | norcar    | Northern Cardinal        |
| 26    | cacwre    | Cactus Wren             | 76    | norfli    | Northern Flicker         |
| 27    | cangoo    | Canada Goose            | 77    | normoc    | Northern Mockingbird     |
| 28    | canwar    | Canada Warbler          | 78    | norpar    | Northern Parula          |
| 29    | canwre    | Canyon Wren             | 79    | norwat    | Northern Waterthrush     |
| 30    | carwre    | Carolina Wren           | 80    | olsfly    | Olive-sided Flycatcher   |
| 31    | caster1   | Caspian Tern            | 81    | orcwar    | Orange-crowned Warbler   |
| 32    | chispa    | Chipping Sparrow        | 82    | osprey    | Western Osprey           |
| 33    | chswar    | Chestnut-sided Warbler  | 83    | ovenbi1   | Ovenbird                 |
| 34    | comgra    | Common Grackle          | 84    | pasfly    | Pacific-slope Flycatcher |
| 35    | comrav    | Northern Raven          | 85    | perfal    | Peregrine Falcon         |
| 36    | comred    | Common Redpoll          | 86    | pinsis    | Pine Siskin              |
| 37    | comter    | Common Tern             | 87    | purfin    | Purple Finch             |
| 38    | comyel    | Common Yellowthroat     | 88    | rebnut    | Red-breasted Nuthatch    |
| 39    | daejun    | Dark-eyed Junco         | 89    | rebwoo    | Red-bellied Woodpecker   |
| 40    | dowwoo    | Downy Woodpecker        | 90    | redcro    | Red Crossbill            |
| 41    | easmea    | Eastern Meadowlark      | 91    | reevir1   | Red-eyed Vireo           |
| 42    | eastow    | Eastern Towhee          | 92    | rewbla    | Red-winged Blackbird     |
| 43    | eawpew    | Eastern Wood Pewee      | 93    | robgro    | Rose-breasted Grosbeak   |
| 44    | eucdov    | Eurasian Collared Dove  | 94    | rocpig    | Rock Dove                |
| 45    | evegro    | Evening Grosbeak        | 95    | ruckin    | Ruby-crowned Kinglet     |
| 46    | fiespa    | Field Sparrow           | 96    | savspa    | Savannah Sparrow         |
| 47    | foxspa    | Red Fox Sparrow         | 97    | scoori    | Scott's Oriole           |
| 48    | gadwal    | Gadwall                 | 98    | snobun    | Snow Bunting             |
| 49    | gnwtea    | Eurasian Teal           | 99    | sonspa    | Song Sparrow             |

**Table 3. Bird species code:** The index and bird code mapping for various bird species. For further information we refer *Birds of the World*<sup>1</sup>.

| Index | bird code | Prediction Accuracy |       |       | Index | bird code | Prediction Accuracy |       |       |
|-------|-----------|---------------------|-------|-------|-------|-----------|---------------------|-------|-------|
|       |           | VGG16               | GRU   | LMU   |       |           | VGG16               | GRU   | LMU   |
| 0     | aldfly    | 0.517               | 0.533 | 0.517 | 50    | gockin    | 0.495               | 0.570 | 0.560 |
| 1     | amecro    | 0.692               | 0.662 | 0.723 | 51    | grcfly    | 0.676               | 0.675 | 0.725 |
| 2     | amegfi    | 0.190               | 0.233 | 0.233 | 52    | greegr    | 0.310               | 0.210 | 0.290 |
| 3     | amered    | 0.550               | 0.600 | 0.589 | 53    | greyel    | 0.383               | 0.467 | 0.467 |
| 4     | amerob    | 0.682               | 0.574 | 0.712 | 54    | grhowl    | 0.750               | 0.762 | 0.727 |
| 5     | annhum    | 0.117               | 0.200 | 0.167 | 55    | grtgra    | 0.219               | 0.264 | 0.282 |
| 6     | astfly    | 0.714               | 0.742 | 0.724 | 56    | haiwoo    | 0.425               | 0.425 | 0.475 |
| 7     | balori    | 0.200               | 0.233 | 0.267 | 57    | hergul    | 0.650               | 0.600 | 0.650 |
| 8     | banswa    | 0.205               | 0.570 | 0.240 | 58    | herthr    | 0.695               | 0.705 | 0.721 |
| 9     | barswa    | 0.738               | 0.812 | 0.771 | 59    | hoowar    | 0.275               | 0.486 | 0.229 |
| 10    | bewwre    | 0.585               | 0.627 | 0.595 | 60    | horlar    | 0.695               | 0.715 | 0.725 |
| 11    | bkcchi    | 0.589               | 0.627 | 0.617 | 61    | houfin    | 0.525               | 0.562 | 0.500 |
| 12    | bkhgro    | 0.570               | 0.500 | 0.560 | 62    | houspa    | 0.863               | 0.877 | 0.864 |
| 13    | bkpwar    | 0.385               | 0.400 | 0.340 | 63    | houwre    | 0.720               | 0.784 | 0.730 |
| 14    | blkpho    | 0.600               | 0.467 | 0.633 | 64    | indbun    | 0.467               | 0.578 | 0.556 |
| 15    | blugrb1   | 0.167               | 0.383 | 0.217 | 65    | killde    | 0.675               | 0.750 | 0.650 |
| 16    | blujay    | 0.633               | 0.657 | 0.676 | 66    | lesgol    | 0.330               | 0.400 | 0.360 |
| 17    | bnhcow    | 0.400               | 0.429 | 0.400 | 67    | lesyel    | 0.320               | 0.230 | 0.360 |
| 18    | boboli    | 0.133               | 0.333 | 0.200 | 68    | linspa    | 0.200               | 0.219 | 0.276 |
| 19    | brespa    | 0.267               | 0.367 | 0.333 | 69    | logshr    | 0.170               | 0.210 | 0.180 |
| 20    | brncre    | 0.668               | 0.641 | 0.677 | 70    | macwar    | 0.243               | 0.343 | 0.286 |
| 21    | brnthr    | 0.095               | 0.050 | 0.090 | 71    | magwar    | 0.441               | 0.468 | 0.493 |
| 22    | buggna    | 0.509               | 0.545 | 0.564 | 72    | mallar3   | 0.812               | 0.825 | 0.812 |
| 23    | buhvir    | 0.140               | 0.420 | 0.190 | 73    | marwre    | 0.677               | 0.719 | 0.701 |
| 24    | bulori    | 0.414               | 0.458 | 0.393 | 74    | mouchi    | 0.356               | 0.489 | 0.356 |
| 25    | bushti    | 0.600               | 0.500 | 0.650 | 75    | norcar    | 0.724               | 0.803 | 0.770 |
| 26    | cacwre    | 0.342               | 0.317 | 0.400 | 76    | norfli    | 0.470               | 0.476 | 0.520 |
| 27    | cangoo    | 0.786               | 0.743 | 0.786 | 77    | normoc    | 0.334               | 0.371 | 0.324 |
| 28    | canwar    | 0.150               | 0.300 | 0.100 | 78    | norpar    | 0.463               | 0.500 | 0.450 |
| 29    | canwre    | 0.597               | 0.467 | 0.540 | 79    | norwat    | 0.600               | 0.650 | 0.667 |
| 30    | carwre    | 0.565               | 0.635 | 0.535 | 80    | olsfly    | 0.217               | 0.600 | 0.333 |
| 31    | caster1   | 0.133               | 0.067 | 0.133 | 81    | orcwar    | 0.390               | 0.524 | 0.411 |
| 32    | chispa    | 0.453               | 0.508 | 0.437 | 82    | osprey    | 0.419               | 0.500 | 0.462 |
| 33    | chswar    | 0.200               | 0.260 | 0.270 | 83    | ovenbi1   | 0.412               | 0.400 | 0.425 |
| 34    | comgra    | 0.233               | 0.400 | 0.133 | 84    | pasfly    | 0.450               | 0.633 | 0.500 |
| 35    | comrav    | 0.846               | 0.834 | 0.855 | 85    | perfal    | 0.340               | 0.290 | 0.440 |
| 36    | comred    | 0.487               | 0.600 | 0.507 | 86    | pinsis    | 0.217               | 0.283 | 0.217 |
| 37    | comter    | 0.713               | 0.773 | 0.747 | 87    | purfin    | 0.188               | 0.343 | 0.119 |
| 38    | comyel    | 0.664               | 0.696 | 0.680 | 88    | rebnut    | 0.770               | 0.790 | 0.830 |
| 39    | daejun    | 0.525               | 0.516 | 0.600 | 89    | rebwoo    | 0.170               | 0.330 | 0.150 |
| 40    | dowwoo    | 0.307               | 0.393 | 0.467 | 90    | redcro    | 0.861               | 0.895 | 0.872 |
| 41    | easmea    | 0.588               | 0.715 | 0.566 | 91    | reevir1   | 0.678               | 0.600 | 0.622 |
| 42    | eastow    | 0.487               | 0.507 | 0.507 | 92    | rewbla    | 0.639               | 0.668 | 0.683 |
| 43    | eawpew    | 0.450               | 0.553 | 0.413 | 93    | robgro    | 0.167               | 0.200 | 0.233 |
| 44    | eucdov    | 0.819               | 0.827 | 0.803 | 94    | rocpig    | 0.450               | 0.400 | 0.300 |
| 45    | evegro    | 0.700               | 0.650 | 0.760 | 95    | ruckin    | 0.540               | 0.600 | 0.600 |
| 46    | fiespa    | 0.400               | 0.300 | 0.300 | 96    | savspa    | 0.566               | 0.527 | 0.592 |
| 47    | foxspa    | 0.212               | 0.305 | 0.271 | 97    | scoori    | 0.292               | 0.317 | 0.167 |
| 48    | gadwal    | 0.292               | 0.183 | 0.350 | 98    | snobun    | 0.133               | 0.200 | 0.133 |
| 49    | gnwtea    | 0.707               | 0.714 | 0.686 | 99    | sonspa    | 0.713               | 0.708 | 0.727 |

**Table 4. Bird species code:** The index and bird code mapping for various bird species. For further information we refer *Birds of the World*<sup>1</sup>.

## References

1. Billerman, S. M., Keeney, B. K., Rodewald, P. G. & Schulenberg, T. S. (eds.) *Birds of the World* (Cornell Laboratory of Ornithology, Ithaca, NY, USA, 2020). <https://birdsoftheworld.org/bow/home>.
